# Supplementary material for: Microbial Diversity Associated with Gwell, a Traditional French Mesophilic Fermented Milk Inoculated with a Natural Starter
Source: MDPI journal article supplement (doi:10.3390/microorganisms8070982), 2020-06-30
Supplement: s1 [file s1]

Table S1: Detailed list of the primers used for the metabarcoding analysis. Illumina tails are showed in bold and frame-shift spacers are underlined.

| Genomic region | Primer name       | Primer sequence                                                                     |
|----------------|-------------------|-------------------------------------------------------------------------------------|
| 16S V3-V4      | Illu4_16SV3F      | <b>TCGTCGGCAGCGTCAGATGTGTATAAGAGACAG</b> <u>NNNNTACGGRAGGCAGCAG</u>                 |
| 16S V3-V4      | Illu6_16SV3F      | <b>TCGTCGGCAGCGTCAGATGTGTATAAGAGACAG</b> <u>NNNNDVTACGGRAGGCAGCAG</u>               |
| 16S V3-V4      | Illu8_16SV3F      | <b>TCGTCGGCAGCGTCAGATGTGTATAAGAGACAG</b> <u>NNNNNNRMTACGGRAGGCAGCAG</u>             |
| 16S V3-V4      | Illu4_16SV4R      | <b>GTCTCGTGGGCTCGGAGATGTGTATAAGAGACAG</b> <u>NNNNTACCAGGGTATCTAATCCT</u>            |
| 16S V3-V4      | Illu5_16SV4R      | <b>GTCTCGTGGGCTCGGAGATGTGTATAAGAGACAG</b> <u>NNNNHTACCAGGGTATCTAATCCT</u>           |
| 16S V3-V4      | Illu6_16SV4R      | <b>GTCTCGTGGGCTCGGAGATGTGTATAAGAGACAG</b> <u>NNNNNWTACCAGGGTATCTAATCCT</u>          |
| ITS2           | Illu4 ITS3tagmix1 | <b>TCGTCGGCAGCGTCAGATGTGTATAAGAGACAG</b> <u>NNNNCTAGACTCGTCATCGATGAAGAACGCAG</u>    |
| ITS2           | Illu6 ITS3tagmix1 | <b>TCGTCGGCAGCGTCAGATGTGTATAAGAGACAG</b> <u>NNNNNDVCTAGACTCGTCATCGATGAAGAACGCAG</u> |
| ITS2           | Illu8 ITS3tagmix1 | <b>TCGTCGGCAGCGTCAGATGTGTATAAGAGACAG</b> <u>NNNNNNRMTAGACTCGTCATCGATGAAGAACGCAG</u> |
| ITS2           | Illu4 ITS4ngs     | <b>GTCTCGTGGGCTCGGAGATGTGTATAAGAGACAG</b> <u>NNNNTTTCCTSCGCTTATTGATATGC</u>         |
| ITS2           | Illu5 ITS4ngs     | <b>GTCTCGTGGGCTCGGAGATGTGTATAAGAGACAG</b> <u>NNNNHTTCCTSCGCTTATTGATATGC</u>         |
| ITS2           | Illu6 ITS4ngs     | <b>GTCTCGTGGGCTCGGAGATGTGTATAAGAGACAG</b> <u>NNNNNWTTTCCTSCGCTTATTGATATGC</u>       |

Table S2: Number of OTUs for the different species identified in the metabarcoding analysis. Total number of OTUs found across all samples, mean and median of the number of OTU per sample are shown.

| Species                        | total number<br>of OTU | mean number of<br>OTU per sample | median number of<br>OTU per sample |
|--------------------------------|------------------------|----------------------------------|------------------------------------|
| Enterococcus sp.               | 1                      | 1.00                             | 1.00                               |
| Lactobacillus acidophilus      | 2                      | 2.00                             | 2.00                               |
| Lactobacillus helveticus       | 1                      | 1.00                             | 1.00                               |
| Lactococcus lactis             | 5                      | 2.31                             | 2.00                               |
| Lactococcus sp.                | 3                      | 1.20                             | 1.00                               |
| Streptococcus salivarius       | 1                      | 1.00                             | 1.00                               |
| Streptococcus saliviroxodontae | 2                      | 1.44                             | 1.00                               |
| Streptococcus sp.              | 2                      | 1.17                             | 1.00                               |
| Geotrichum candidum            | 1                      | 1.00                             | 1.00                               |
| Kazachstania servazzii         | 1                      | 1.00                             | 1.00                               |
| Saccharomyces cerevisiae       | 1                      | 1.00                             | 1.00                               |
| Saccharomycetales sp.          | 2                      | 2.00                             | 2.00                               |
| Yarrowia lipolytica            | 1                      | 1.00                             | 1.00                               |
